## PlotTwist – a web app for plotting and annotating time-series data

Joachim Goedhart<sup>\*, ‡</sup>

<sup>\*</sup>Swammerdam Institute for Life Sciences, Section of Molecular Cytology, van Leeuwenhoek Centre for Advanced Microscopy, University of Amsterdam, P.O. Box 94215, NL-1090 GE Amsterdam, The Netherlands.

<sup>‡</sup>Email: [j.goedhart@uva.nl](mailto:j.goedhart@uva.nl) | Twitter: [@joachimgoedhart](https://twitter.com/joachimgoedhart)

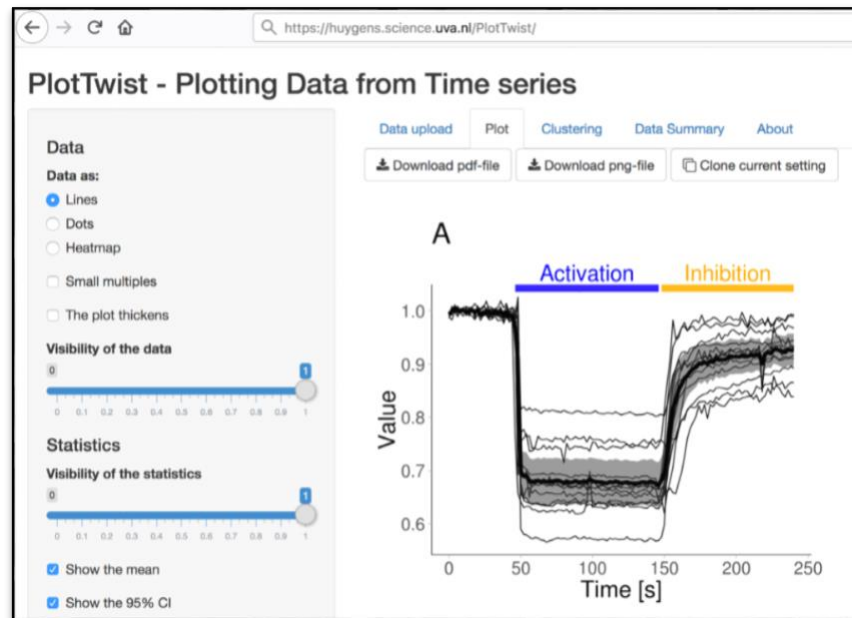

### Abstract

The results from time-dependent experiments are often used to generate plots that visualize how the data evolves over time. To simplify state-of-the-art data visualization and annotation of data from such experiments, an open source tool was created with R/shiny. The freely available web app accepts wide (spreadsheet) and tidy data and offers a range of options to normalize the data. The data from individual objects can be shown in three different ways: (i) lines with unique colors, (ii) small multiples and (iii) heatmap-style display. Next to this, the mean can be displayed with a 95% confidence interval for the visual comparison of different conditions. The plots can be annotated with graphical features and/or text to indicate any perturbations that were applied during the time-lapse experiments. All user-defined settings can be stored for reproducibility of the data visualization. The app is dubbed PlotTwist and is available online: <https://huygens.science.uva.nl/PlotTwist>

## Introduction

It has been stressed over the years that showing the actual data from individual measurements, instead of summaries only, gives a better picture of the actual data summaries (Weissgerber et al., 2015; Rousselet et al., 2017; Drummond and Vowler, 2011). This holds true for data acquired under static conditions as well as for time-dependent data to study dynamics. For static conditions, dotplots are a good way to graphically depict the data. Several online data visualization tools have been reported that include the option to display the actual data (Weissgerber et al., 2017; Postma and Goedhart, 2019; Goedhart, 2019; Ho et al., 2019).

However, similar online tools for the visualization of continuous data seem (to the best of our knowledge) to be lacking. This is surprising, since understanding dynamic systems, especially relevant in biology, requires experimentation over time. In addition, time-series experiments can be high content (Megason and Fraser, 2007) and may include the application of multiple, different perturbations. The complexity of time-series data requires a tool to rapidly inspect the data and have access to different visualizations. Next to that, it is important to clearly communicate the treatments/perturbations that were applied during the experiment. Ideally, a data visualization tool for time-series data would be freely available, open source and generate high quality graphs that are publication ready. Having previously reported such a webtool for static data (Postma and Goedhart, 2019) and given the enthusiastic response by the community, we were motivated to generate a webtool for time-series data.

The new web-tool that we generated is dubbed PlotTwist, for plotting data from Time-lapse experiments With Indicators of conditions at Set Times. This free and open source app is developed to facilitate the rapid visualization and annotation of time-lapse data. Creating graphs with PlotTwist does not require coding skills, yet it produces the state-of-the-art data visualization offered by the ggplot2 package. Therefore, we think that PlotTwist is well-suited to inspect data and generate publication quality visualizations of data from time-lapse experiments. The features and use of PlotTwist are highlighted below.

## Availability, code & issues

The PlotTwist webtool is available at: <https://huygens.science.uva.nl/PlotTwist> or <https://goedhart.shinyapps.io/PlotTwist/>

The code was written in R using R (<https://www.r-project.org>) and Rstudio (<https://www.rstudio.com>). To run the app several freely available packages are required: shiny, ggplot2, dplyr, tidyr, readr, readxl, magrittr, DT, dtw (Giorgino, 2009). The code of version 1.0.1 reported in this manuscript is archived at Zenodo.org: <https://doi.org/10.5281/zenodo.3374445>

Up-to-date code and new release will be made available on Github, together with information on running the app locally: <https://github.com/JoachimGoedhart/PlotTwist>

The Github page of PlotTwist is the preferred way to communicate issues and request features (<https://github.com/JoachimGoedhart/PlotTwist/issues>). Alternatively, the users can contact the developers by email or [Twitter](#). Contact information is found on the “About” page of the app.

## Data input, structure and normalization

The data can be provided by copy-paste or via upload of a CSV or XLS file. The data structure can be either a wide, spreadsheet type format or a long, tidy format. Example data, of which the details can be found in earlier publications (Reinhard et al., 2017; Mastop et al., 2017) is included in the app.

Wide data format: For the wide format, the first column is assumed to contain the time-points. Each of the other columns is taken as data of different samples. The wide format will be converted into the tidy format (Figure 1). This conversion is not visible for the user, but it is required for plotting with ggplot2. When multiple wide datasets are simultaneously uploaded (in CSV or XLS format) each of these is treated as a different condition. The filename is used as a label for the condition.

Tidy data format: For data in a tidy data format, the user is asked to select the columns that have (i) the time data, (ii) the measured data (values) (iii) a unique identifier for each sample and (iv) the condition.

After data upload, there are several options to normalize the data, to facilitate comparison. Some of the normalization options are: divide values over a baseline value ( $I/I_0$ ), divide a difference by the baseline ( $\Delta I/I_0$ ), divide by the maximum value and scale between 0 and 1. The normalized data in a tidy format can be downloaded as a CSV file (comma separated values).

Finally, there is an option to deselect data from individual objects.

## Wide data format

| Time | A   | B   | C   |
|------|-----|-----|-----|
| 0    | 1.1 | 4.2 | 5.6 |
| 1    | 1.0 | 4.5 | 5.8 |

## Tidy data format

| Time | Sample | Value |
|------|--------|-------|
| 0    | A      | 1.1   |
| 1    | A      | 1.0   |
| 0    | B      | 4.2   |
| 1    | B      | 4.5   |
| 0    | C      | 5.6   |
| 1    | C      | 5.8   |

**Figure 1:** The wide versus tidy data format for time dependent data. In the wide (spreadsheet-like) data format the first column holds the time data and the other columns represent data from different objects (A,B & C). In the tidy format each column is a single variable and each row is an observation. Note that the time data is repeated for each of the objects A,B & C.

## Data visualization

The default graph shows time along the x-axis and the measurement values on the y-axis. A line plot is constructed by connecting all the coordinates from each sample by lines. The mean value and/or the 95% confidence interval of the mean can be drawn as a transparent layer on top of the lines from individual samples. The 95% confidence intervals enable the comparison of difference conditions by 'visual inference' (Cumming and Finch, 2005; Cumming et al., 2007; Gardner and Altman, 1986). The line thickness and transparency of the individual data and statistical summary can be adjusted by the user. Several color palettes that are colorblindness friendly are available for the individual data and the statistics. When data for multiple conditions is provided, the statistics for each of the conditions can be shown with different colors. By tweaking the transparency, color and line thickness, the display of the individual data and summary can be optimized.

## Display of data from individual objects

When multiple objects (cells) are measured simultaneously, it is often useful to examine the responses of the individual objects. To this end, PlotTwist can show the data in three different ways: (i) single time-traces that can be distinguished by color, (ii) small multiples showing each response in a separate graph and (iii) a heatmap-style representation that shows the response of each object in false color. The heatmap-style representation is especially suited for the display of datasets with many objects (>10 objects). Figure 2 shows the same data in an ordinary lineplot (panel A) and in a heatmap style presentation (panel B). When a heatmap is used, the data from the different objects can be sorted according to several criteria, including the maximal signal, integrated response and alphabetical order.

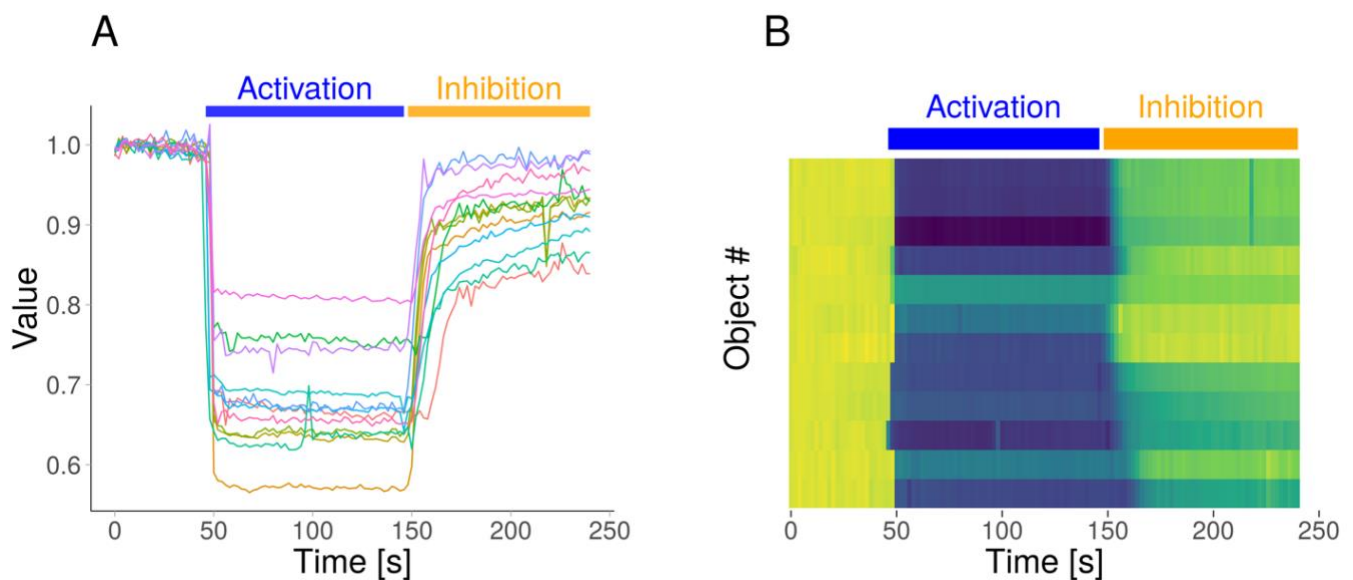

**Figure 2:** Ordinary and heatmap style presentation of the (same) example data. Both graphs are annotated with bars on top of the plot to display an activating and an inhibiting perturbation.

## Color

Color is an important feature for distinguishing objects or conditions. In PlotTwist, color can be added to the individual objects or it can be used to group conditions. The standard color palette of R is the default. Next to this, several colorblind safe palettes have been implemented, which were taken from Paul Tol (<https://personal.sron.nl/~pault/>) and Masataka Okabe & Kei Ito (<https://jfly.uni-koeln.de/color/>). Which of these are most suitable need to be decided on a case-by-case basis. Finally, user-defined colors can be applied by either typing the name or the hexadecimal color code. An example, also available in PlotTwist, of three different colors: “turquoise2,#FF2222,lawngreen”, where #FF2222 is a hexadecimal code for red. Whenever there are more objects than colors, the color scheme will be repeated, and therefore different objects will be labeled with the same color. For the heatmap style presentation the perceptually uniform and colorblindness friendly viridis color palette is used (<https://bids.github.io/colormap/>).

## Annotation

Time-lapse experiments are uniquely suited to analyze the effects of multiple perturbations during a single measurement. Some examples of perturbations in biological experiments are (i) the application of an agonist to stimulate signal transduction, (ii) the addition of a drug to inhibit proteins or stimulate dimerization or (iii) illumination of light sensitive proteins (optogenetics) to direct cellular processes. The annotation of plots to indicate the treatments/perturbations is often done manually. This can be time-consuming and inaccurate. To address this issue, PlotTwist enables straightforward and reproducible annotation of an unlimited number of conditions. The annotation can be added as a bar above the plot, a box in the plot or a combination. The color of the annotation can be adjusted and text can be added. An example of annotations is shown in figure 2, where the time windows of ‘activation’ and ‘inhibition’ are indicated by bars on top of the plot.

## Output

In case that the data was subjected to normalization, the processed data can be downloaded as a CSV file in tidy format. These new files can be used by PlotTwist to replot the data.

The plot that is generated by the app can be directly retrieved by drag-and-drop from the web browser. In addition, the plot can be downloaded as a PNG or PDF file. The PNG is a lossless bitmap format. The PDF allows for downstream processing/editing with software that can handle vector-based graphics.

## Reproducibility

In general, graphical user interfaces offer substantial flexibility in the options and parameters that can be set. Specifically, in PlotTwist, the user has control over scaling, annotation, color and more. Due to this flexibility, it is challenging to exactly reproduce the settings. Here, to achieve reproducibility, we have included an option to ‘clone’ the active setting. This action will generate a URL (Uniform Resource Locator) with all relevant parameters from the user interface. Through the URL, the parameters are fed back into the webtool and the settings are restored. In supplemental text S1, all

the parameters (and their accepted values) that can be set through the URL are listed. As an example, figure 2A can be reproduced by employing this URL:

[https://huygens.science.uva.nl/PlotTwist/?data=1;;;fold;1,5;&vis=dataasline;1;;;1;&layout=%20;TRUE; ;%20;TRUE;;1;X;480;480&color=none&label=TRUE;A;TRUE;Time%20\[s\];Value;TRUE;30;24;18;8;;&stim=TRUE;bar;46,146,148,240;Activation,Inhibition;Blue,Orange&](https://huygens.science.uva.nl/PlotTwist/?data=1;;;fold;1,5;&vis=dataasline;1;;;1;&layout=%20;TRUE; ;%20;TRUE;;1;X;480;480&color=none&label=TRUE;A;TRUE;Time%20[s];Value;TRUE;30;24;18;8;;&stim=TRUE;bar;46,146,148,240;Activation,Inhibition;Blue,Orange&)

Moreover, the option to set parameters through a URL allows to make presets. For instance, when a certain set of graphs need to be annotated in the same way this can be achieved by passing the relevant parameters through the URL. For annotation with three labels (baseline, activation, inhibition) at times 10-40, 60-140, 170-240, the following URL can be used:

<https://huygens.science.uva.nl/PlotTwist/?stim=TRUE;bar;10,40,60,140,170,240;baseline,activation,inhibition>

After using the URL to start PlotTwist, the data can be uploaded and the (preset) annotation will be present in the plot that visualizes the imported data.

## Conclusion

Performing measurements over time on several objects is an important experimental strategy. The resulting data can be high-content (when many objects are measured) and complex (due to application of different treatments or perturbations). To evaluate the results, data visualization tools that can rapidly switch between different presentation modes are needed. To communicate the results, state-of-the-art data visualization tools that enable clear annotations are needed. We have developed the freely available and open source tool PlotTwist, to serve both purposes. It can be used for inspection of data and rapidly switch between different presentations, a.o. standard line plot, small multiples and heatmap. Basic statistics (mean and 95%CI) can be added in user defined transparency and color. To generate publication-ready figures we use the state-of-the-art graphical package (ggplot2) to make the plots. The plots can be supplemented with reproducible annotations to indicate different conditions. The annotations will help to clearly communicate the experimental design and aid the interpretation. In summary, PlotTwist allows anyone to inspect data and to generate state-of-the-art data visualizations. Although this application was written with biological processes in mind, it could be used for any dataset from time-dependent measurements.

## Acknowledgments

Some of the PlotTwist code is taken from PlotsofData and it is partially inspired by ggplotGUI (<https://github.com/gertstulp/ggplotgui/>) by Gert Stulp.

The colorblind safe palettes were developed by Paul Tol (<https://personal.sron.nl/~pault/>) and Masataka Okabe & Kei Ito (<https://jfly.uni-koeln.de/color/>). We are grateful to our colleagues at Molecular Cytology (UvA) for helpful discussions and Auke Folkerts (UvA, The Netherlands) for help with the server that runs shiny. Finally, the feedback, suggestions, enthusiastic responses and example plots that are shared on Twitter are highly appreciated.



## References

- Cumming, G., F. Fidler, and D.L.D.L. Vaux. 2007. Error bars in experimental biology. *J. Cell Biol.* 177:7–11. doi:10.1083/jcb.200611141.
- Cumming, G., and S. Finch. 2005. Inference by eye: confidence intervals and how to read pictures of data. *Am. Psychol.* 60:170–180. doi:10.1037/0003-066X.60.2.170.
- Drummond, G.B., and S.L. Vowler. 2011. Show the data, don't conceal them. *J. Physiol.* 589:1861–1863. doi:10.1113/jphysiol.2011.205062.
- Gardner, M.J., and D.G. Altman. 1986. Confidence intervals rather than P values: estimation rather than hypothesis testing. *Br. Med. J. (Clin. Res. Ed)*. 292:746–50. doi:10.1136/bmj.292.6522.746.
- Giorgino, T. 2009. Computing and Visualizing Dynamic Time Warping Alignments in R : The **dtw** Package. *J. Stat. Softw.* 31:1–24. doi:10.18637/jss.v031.i07.
- Goedhart, J. 2019. PlotsOfDifferences - a web app for the quantitative comparison of unpaired data. *bioRxiv*. 578575. doi:10.1101/578575.
- Ho, J., T. Tumkaya, S. Aryal, H. Choi, and A. Claridge-Chang. 2019. Moving beyond P values: data analysis with estimation graphics. *Nat. Methods*. 16:565–566. doi:10.1038/s41592-019-0470-3.
- Mastop, M., D.S. Bindels, N.C. Shaner, M. Postma, T.W.J. Gadella, and J. Goedhart. 2017. Characterization of a spectrally diverse set of fluorescent proteins as FRET acceptors for mTurquoise2. *Sci. Rep.* doi:10.1038/s41598-017-12212-x.
- Megason, S.G., and S.E. Fraser. 2007. Imaging in systems biology. *Cell*. 130:784–795.
- Postma, M., and J. Goedhart. 2019. PlotsOfData—A web app for visualizing data together with their summaries. *PLOS Biol.* 17:e3000202. doi:10.1371/journal.pbio.3000202.
- Reinhard, N.R., M. Mastop, T. Yin, Y. Wu, E.K. Bosma, T.W.J. Gadella, J. Goedhart, and P.L. Hordijk. 2017. The balance between Gai-Cdc42/Rac and Gα12/13-RhoA pathways determines endothelial barrier regulation by sphingosine-1-phosphate. *Mol. Biol. Cell*. 28. doi:10.1091/mbc.E17-03-0136.
- Rousselet, G.A., C.R. Pernet, and R.R. Wilcox. 2017. Beyond differences in means: robust graphical methods to compare two groups in neuroscience. *Eur. J. Neurosci.* 46:1738–1748. doi:10.1111/ejn.13610.
- Weissgerber, T.L., N.M. Milic, S.J. Winham, and V.D. Garovic. 2015. Beyond Bar and Line Graphs: Time for a New Data Presentation Paradigm. *PLOS Biol.* 13:e1002128. doi:10.1371/journal.pbio.1002128.
- Weissgerber, T.L., M. Savic, S.J. Winham, D. Stanisavljevic, V.D. Garovic, and N.M. Milic. 2017. Data visualization, bar naked: A free tool for creating interactive graphics. *J. Biol. Chem.* 292:20592–20598. doi:10.1074/jbc.RA117.000147.
